# Supplementary material
Source: PubMed Central journal article supplement (PMC6759926)
Supplement: NIHMS1049118-supplement-S1_and_S2.pdf [file NIHMS1049118-supplement-S1_and_S2.pdf]

Supplementary Table I. Odds ratios for rapid weight gain comparing mothers with PCOS to mothers without PCOS in children from 4 to 12 months by PCOS status in the Upstate KIDS Study

|                      | Unadjusted |       |        |         | Fully Adjusted |       |      |         |
|----------------------|------------|-------|--------|---------|----------------|-------|------|---------|
|                      | OR         | Lower |        | p-value | OR             | Lower |      | p-value |
| 95% CI               |            | Upper | 95% CI |         |                | Upper |      |         |
| <b>Total</b>         |            |       |        |         |                |       |      |         |
| <b>All children</b>  |            |       |        |         |                |       |      |         |
| <b>(n=4,098)</b>     |            |       |        |         |                |       |      |         |
| 4 months             | 0.92       | 0.67  | 1.26   | 0.61    | 0.89           | 0.62  | 1.26 | 0.50    |
| 9 months             | 1.00       | 0.75  | 1.32   | 0.97    | 0.94           | 0.69  | 1.28 | 0.69    |
| 12 months            | 1.05       | 0.78  | 1.40   | 0.76    | 1.00           | 0.73  | 1.36 | 0.98    |
| <b>Singletons</b>    |            |       |        |         |                |       |      |         |
| <b>(n=3,204)</b>     |            |       |        |         |                |       |      |         |
| 4 months             | 0.80       | 0.53  | 1.22   | 0.30    | 1.02           | 0.53  | 1.32 | 0.44    |
| 9 months             | 0.96       | 0.67  | 1.67   | 0.81    | 0.93           | 0.63  | 1.37 | 0.72    |
| 12 months            | 1.02       | 0.70  | 1.48   | 0.92    | 0.98           | 0.66  | 1.46 | 0.93    |
| <b>Twins (n=894)</b> |            |       |        |         |                |       |      |         |
| 4 months             | 1.54       | 0.98  | 2.44   | 0.06    | 1.69           | 0.94  | 2.72 | 0.09    |
| 9 months             | 1.06       | 0.70  | 1.61   | 0.78    | 0.96           | 0.59  | 1.58 | 0.88    |
| 12 months            | 1.22       | 0.79  | 1.89   | 0.37    | 1.10           | 0.66  | 1.81 | 0.72    |

Fully adjusted model adjusted for maternal age, body mass index, race/ethnicity, marital status, private insurance, education, smoking during pregnancy, drinking during pregnancy, any diabetes, and plurality

Supplementary Table II. Difference in growth measures from birth through 3 years of age comparing offspring of mothers with PCOS to offspring of mothers without PCOS, stratified by fertility treatment, in the Upstate KIDS Study

|                                                         | Beta   | Fully adjusted |              | p-value |
|---------------------------------------------------------|--------|----------------|--------------|---------|
|                                                         |        | Lower 95% CI   | Upper 95% CI |         |
| <b>Children not conceived using fertility treatment</b> |        |                |              |         |
| Weight (g)                                              | 60.24  | -105.04        | 225.53       | 0.47    |
| Weight for age (z-score)                                | -0.01  | -0.18          | 0.16         | 0.89    |
| Length (cm)                                             | 0.48   | -0.08          | 1.04         | 0.09    |
| Length for age (z-score)                                | -0.14  | 0.32           | 0.04         | 0.14    |
| BMI (kg/m <sup>2</sup> )                                | -0.18  | -0.43          | 0.07         | 0.15    |
| BMI (z-score)                                           | -0.14  | -0.31          | 0.04         | 0.12    |
| <b>Children conceived using fertility treatment</b>     |        |                |              |         |
| Weight (g)                                              | -58.05 | -161.81        | 45.73        | 0.27    |
| Weight for age (z-score)                                | -0.07  | -0.18          | 0.04         | 0.22    |
| Length (cm)                                             | -0.24  | -0.57          | 0.09         | 0.15    |
| Length for age (z-score)                                | -0.02  | -0.14          | 0.11         | 0.78    |
| BMI (kg/m <sup>2</sup> )                                | -0.07  | -0.24          | 0.11         | 0.43    |
| BMI (z-score)                                           | -0.04  | -0.15          | 0.08         | 0.56    |
